# Supplementary material for: MEF2C regulates cortical inhibitory and excitatory synapses and behaviors relevant to neurodevelopmental disorders
Source: eLife journal article supplement (doi:10.7554/elife.20059), 2016-10-24
Supplement: supp [file elife_poa_e20059_Source_Code.docx]

Codes of custom ImageJ Macros for Inhibitory Synapse Counting using ImageJ FIJI

Triple_Coloc.ijm:

//run("Select None");

run("Duplicate...", "title=[GFP] duplicate slices=1");

setOption("BlackBackground", false);

setThreshold(37280,65535);

run("Convert to Mask");

run("Duplicate...");

run("Tiff...");

run("Close");

run("Put Behind [tab]");

run("Duplicate...", "title=[channel_2] duplicate slices=2");

setOption("BlackBackground", false);

setThreshold(13604,65535);

run("Convert to Mask");

run("Cascade");

run("Put Behind [tab]");

run("Put Behind [tab]");

run("Duplicate...", "title=[channel_3] duplicate slices=3");

setOption("BlackBackground", false);

setThreshold(13941,65535);

run("Convert to Mask");

run("Tiff...");

selectWindow("GFP");

run("Create Selection");

run("Measure");

selectWindow("channel_2");

run("Restore Selection");

run("Clear Outside");

run("Create Selection");

selectWindow("channel_3.tif");

run("Restore Selection");

run("Clear Outside");

run("Select None");

run("Analyze Particles...", " summarize");

run("Close All");

Triple_Coloc_presynaptic.ijm:

//run("Select None");

run("Duplicate...", "title=[GFP] duplicate slices=1");

setOption("BlackBackground", false);

setThreshold(39920,65535);

run("Convert to Mask");

run("Duplicate...");

run("Tiff...");

run("Close");

run("Put Behind [tab]");

run("Duplicate...", "title=[channel_2] duplicate slices=2");

setOption("BlackBackground", false);

setThreshold(21387,65535);

run("Convert to Mask");

run("Tiff...");

selectWindow("GFP");

run("Create Selection");

run("Measure");

selectWindow("channel_2.tif");

run("Restore Selection");

run("Clear Outside");

selectWindow("channel_2.tif");

run("Restore Selection");

run("Clear Outside");

run("Select None");

run("Analyze Particles...", " summarize");

run("Close All");

Triple_Coloc_postsynaptic.ijm:

//run("Select None");

run("Duplicate...", "title=[GFP] duplicate slices=1");

setOption("BlackBackground", false);

setThreshold(37918,65535);

run("Convert to Mask");

run("Duplicate...");

run("Tiff...");

run("Close");

run("Put Behind [tab]");

run("Duplicate...", "title=[channel_3] duplicate slices=3");

setOption("BlackBackground", false);

setThreshold(25213,65535);

run("Convert to Mask");

run("Tiff...");

selectWindow("GFP");

run("Create Selection");

run("Measure");

selectWindow("channel_3.tif");

run("Restore Selection");

run("Clear Outside");

run("Select None");

run("Analyze Particles...", " summarize");

run("Close All");
