# Supplementary figures and images for: MEF2C regulates cortical inhibitory and excitatory synapses and behaviors relevant to neurodevelopmental disorders
Source: eLife journal article supplement (doi:10.7554/elife.20059), 2016-10-24

Figure S6 - Harrington et al.

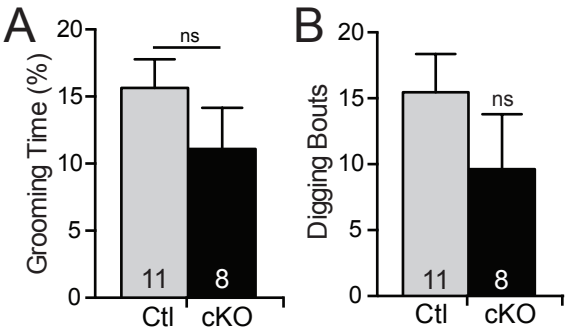

Supplement: supp [file elife-20059-supp-v1.zip]

Figure S1 - Harrington et al.

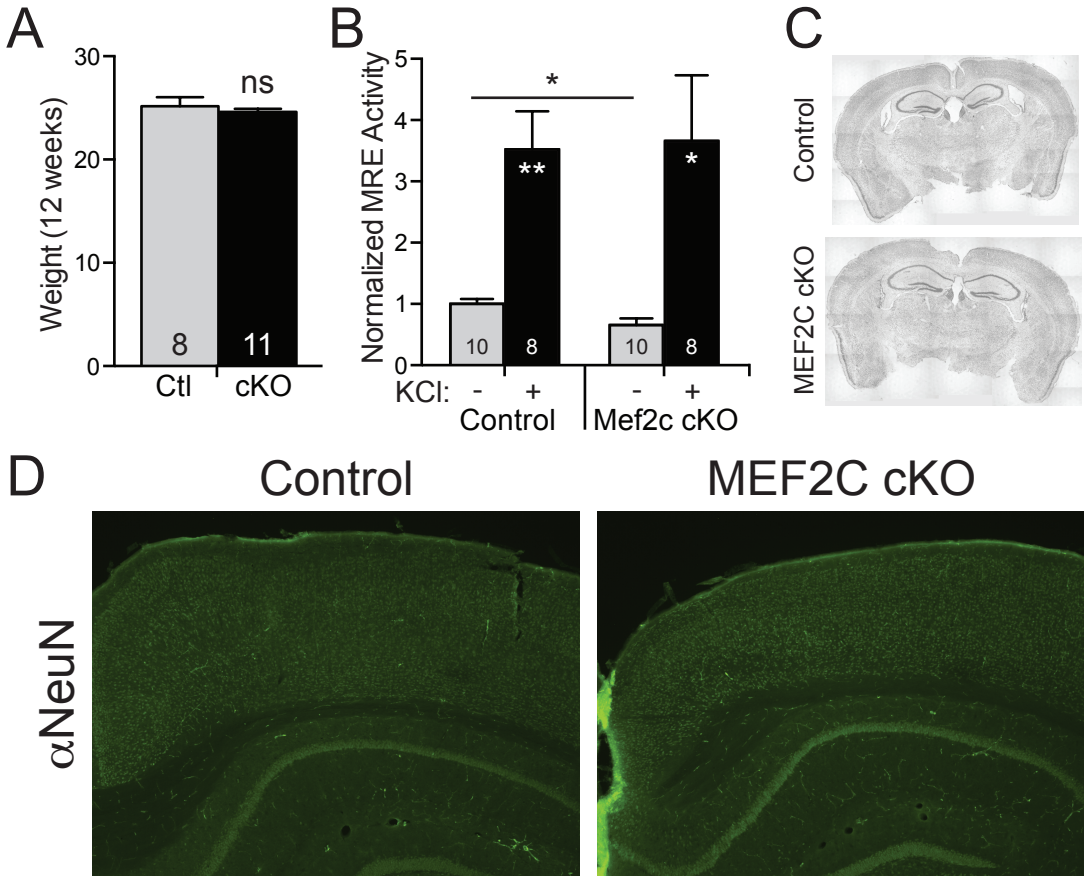

Supplement: supp [file elife-20059-supp-v1.zip]

Figure S5 - Harrington et al.

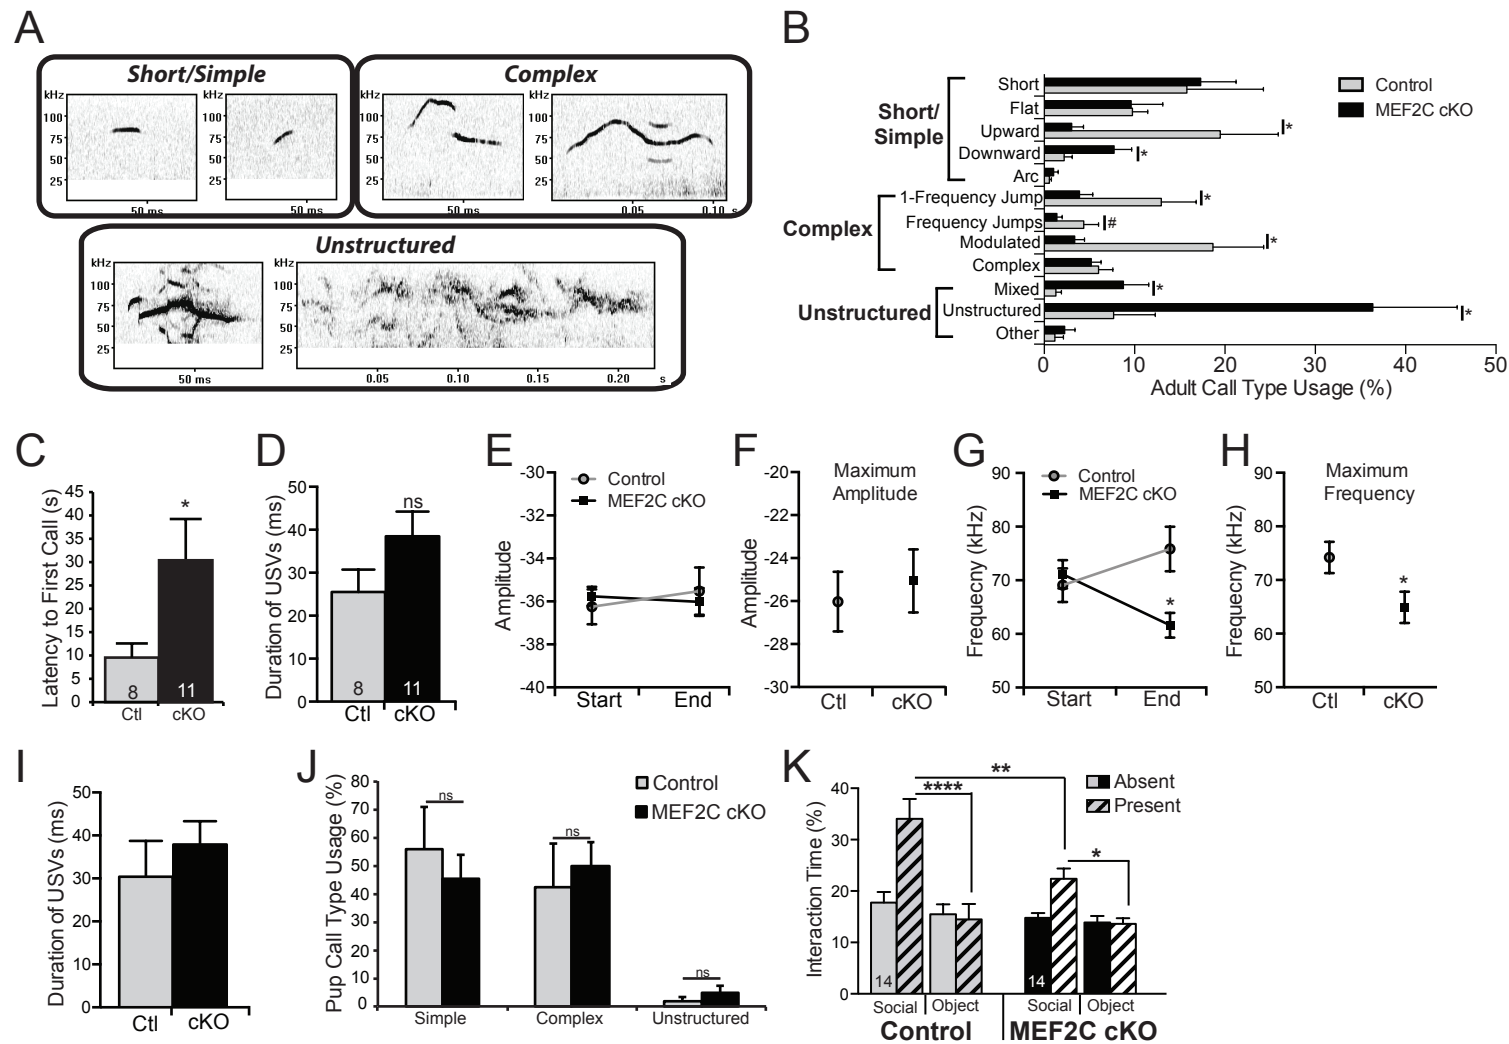

Supplement: supp [file elife-20059-supp-v1.zip]

Figure S4 - Harrington et al.

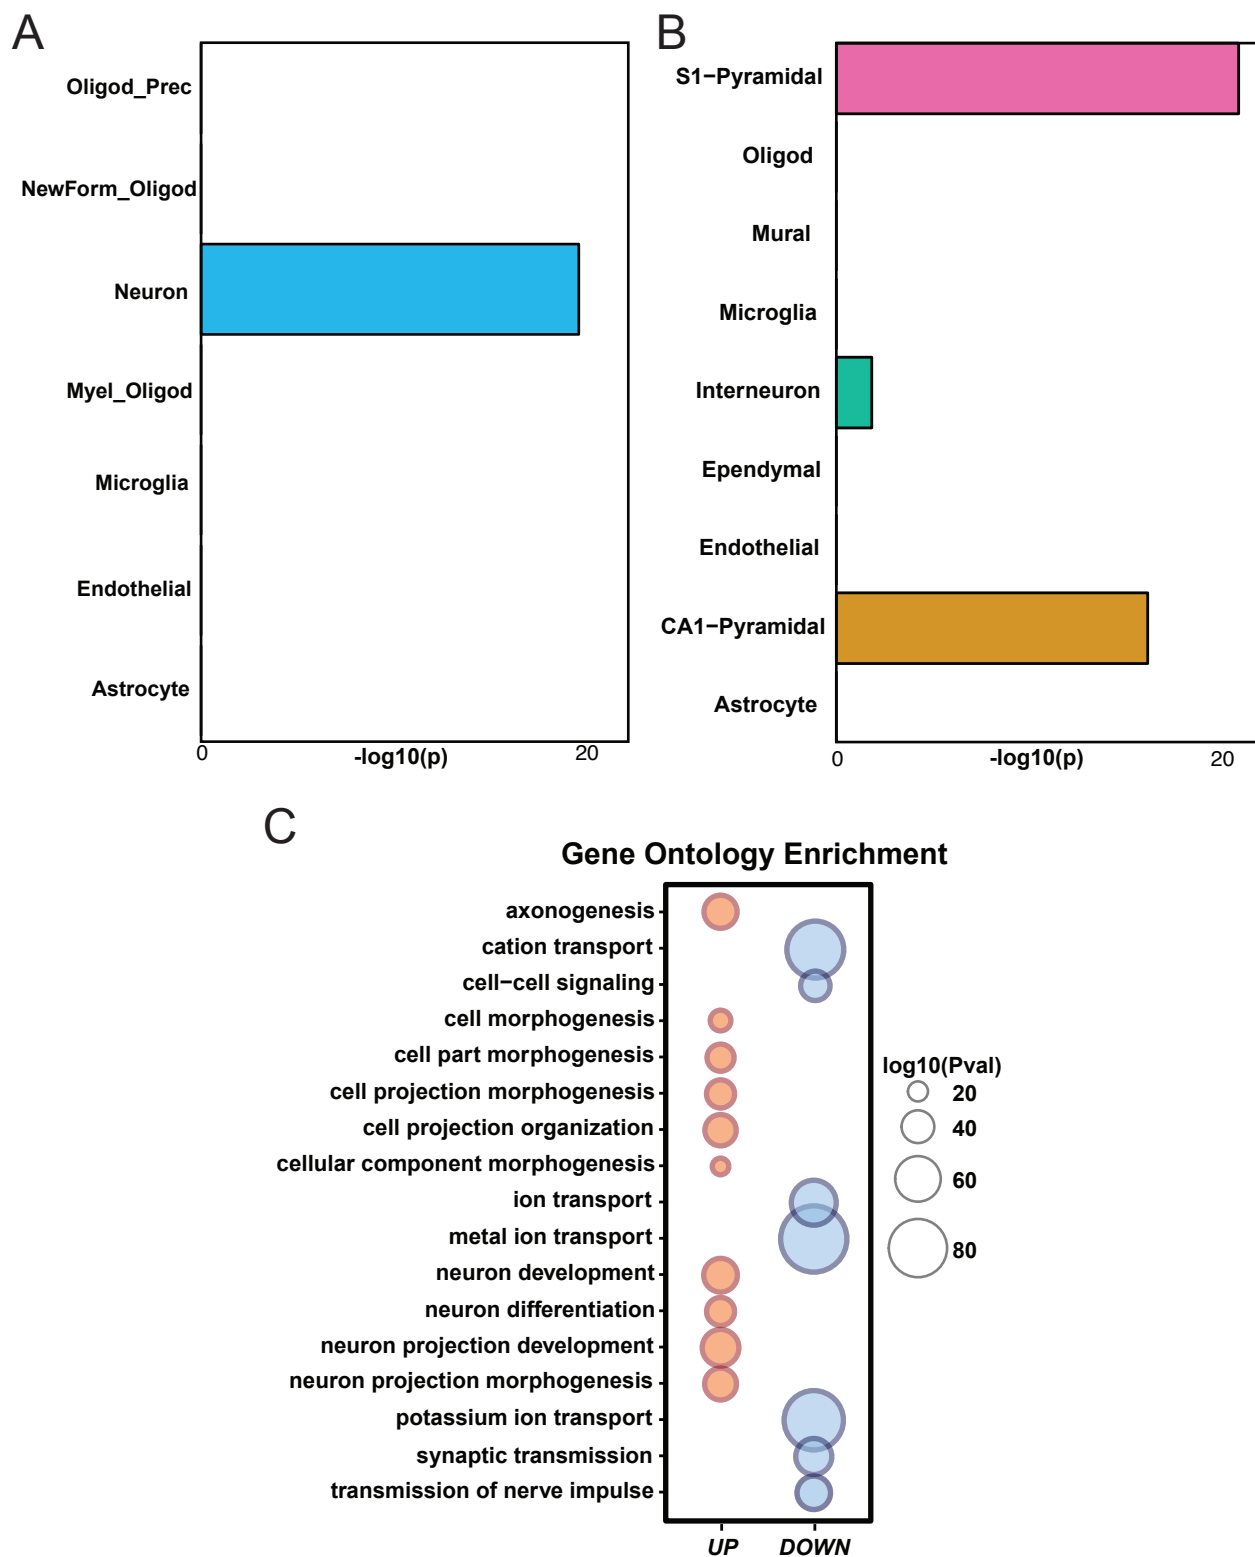

Supplement: supp [file elife-20059-supp-v1.zip]

Figure S3 - Harrington et al.

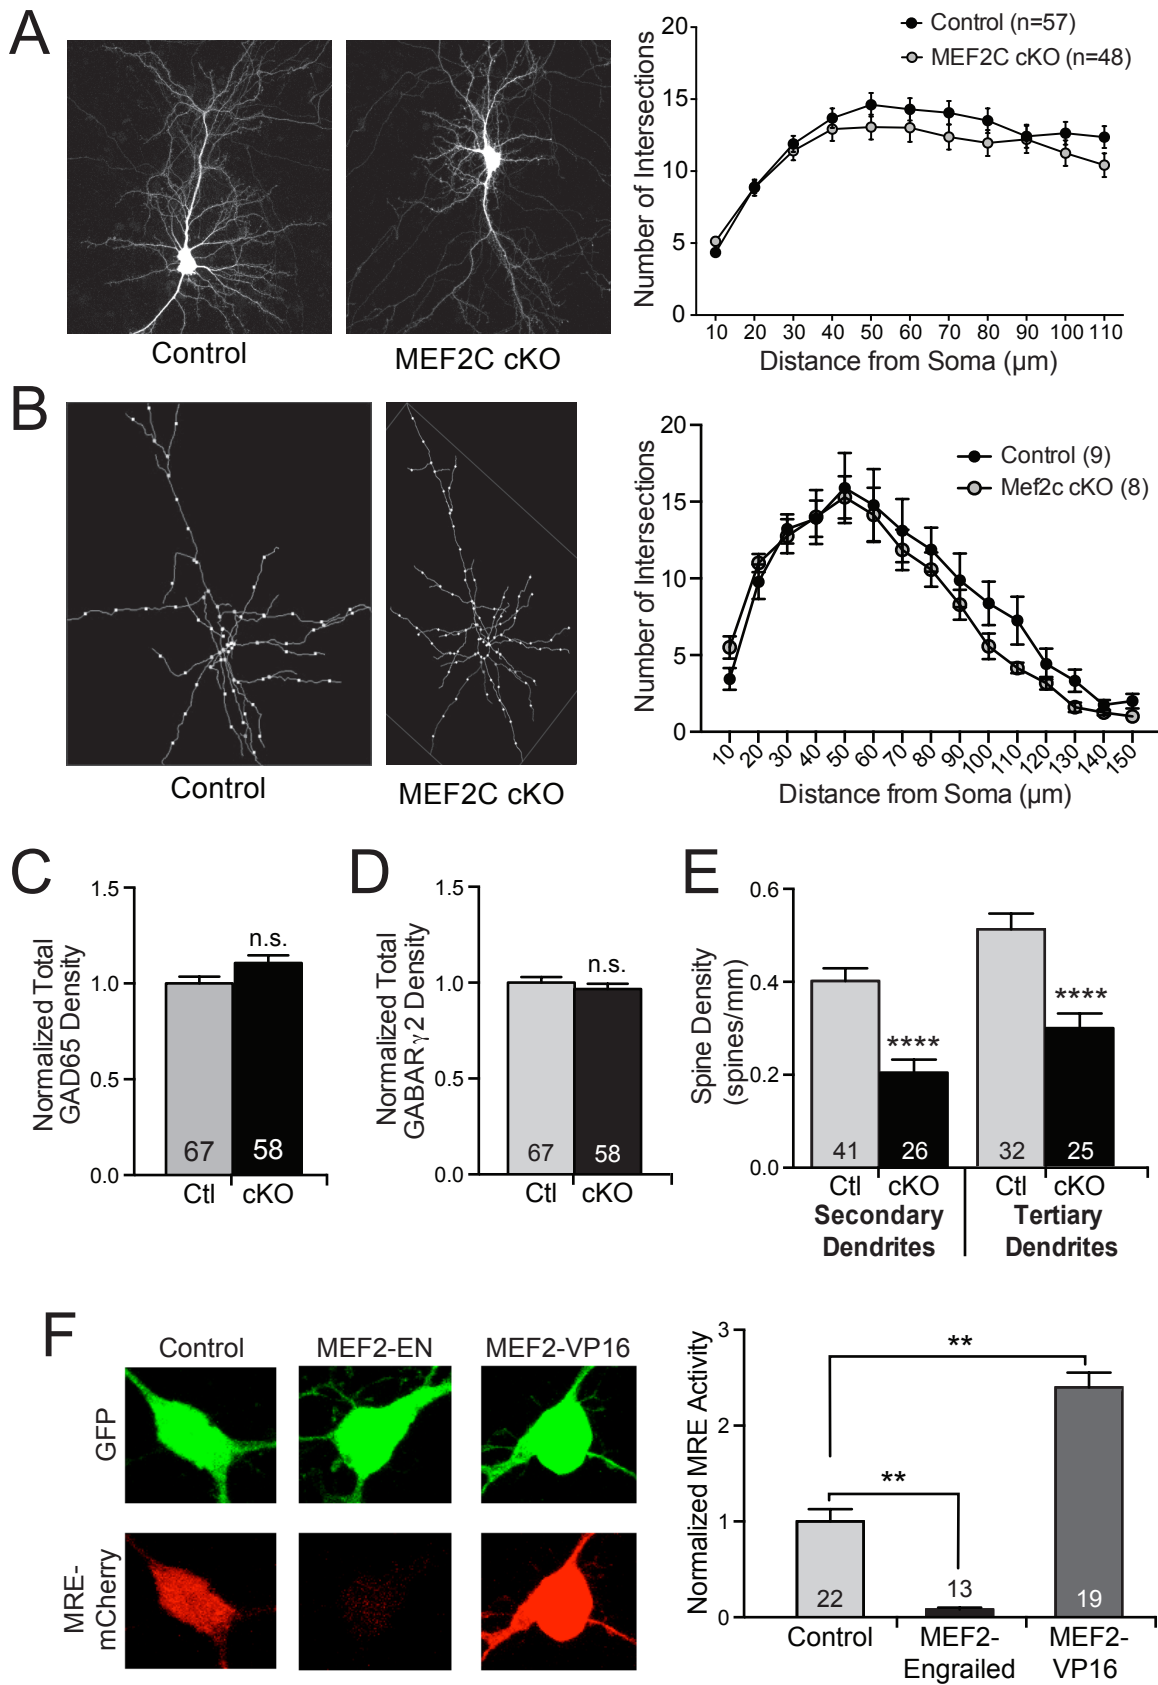

Supplement: supp [file elife-20059-supp-v1.zip]
